# Supplementary material
Source: PubMed Central journal article supplement (PMC31192)
Supplement: pnas_061029298_2.pdf [file pnas_061029298_2.pdf]

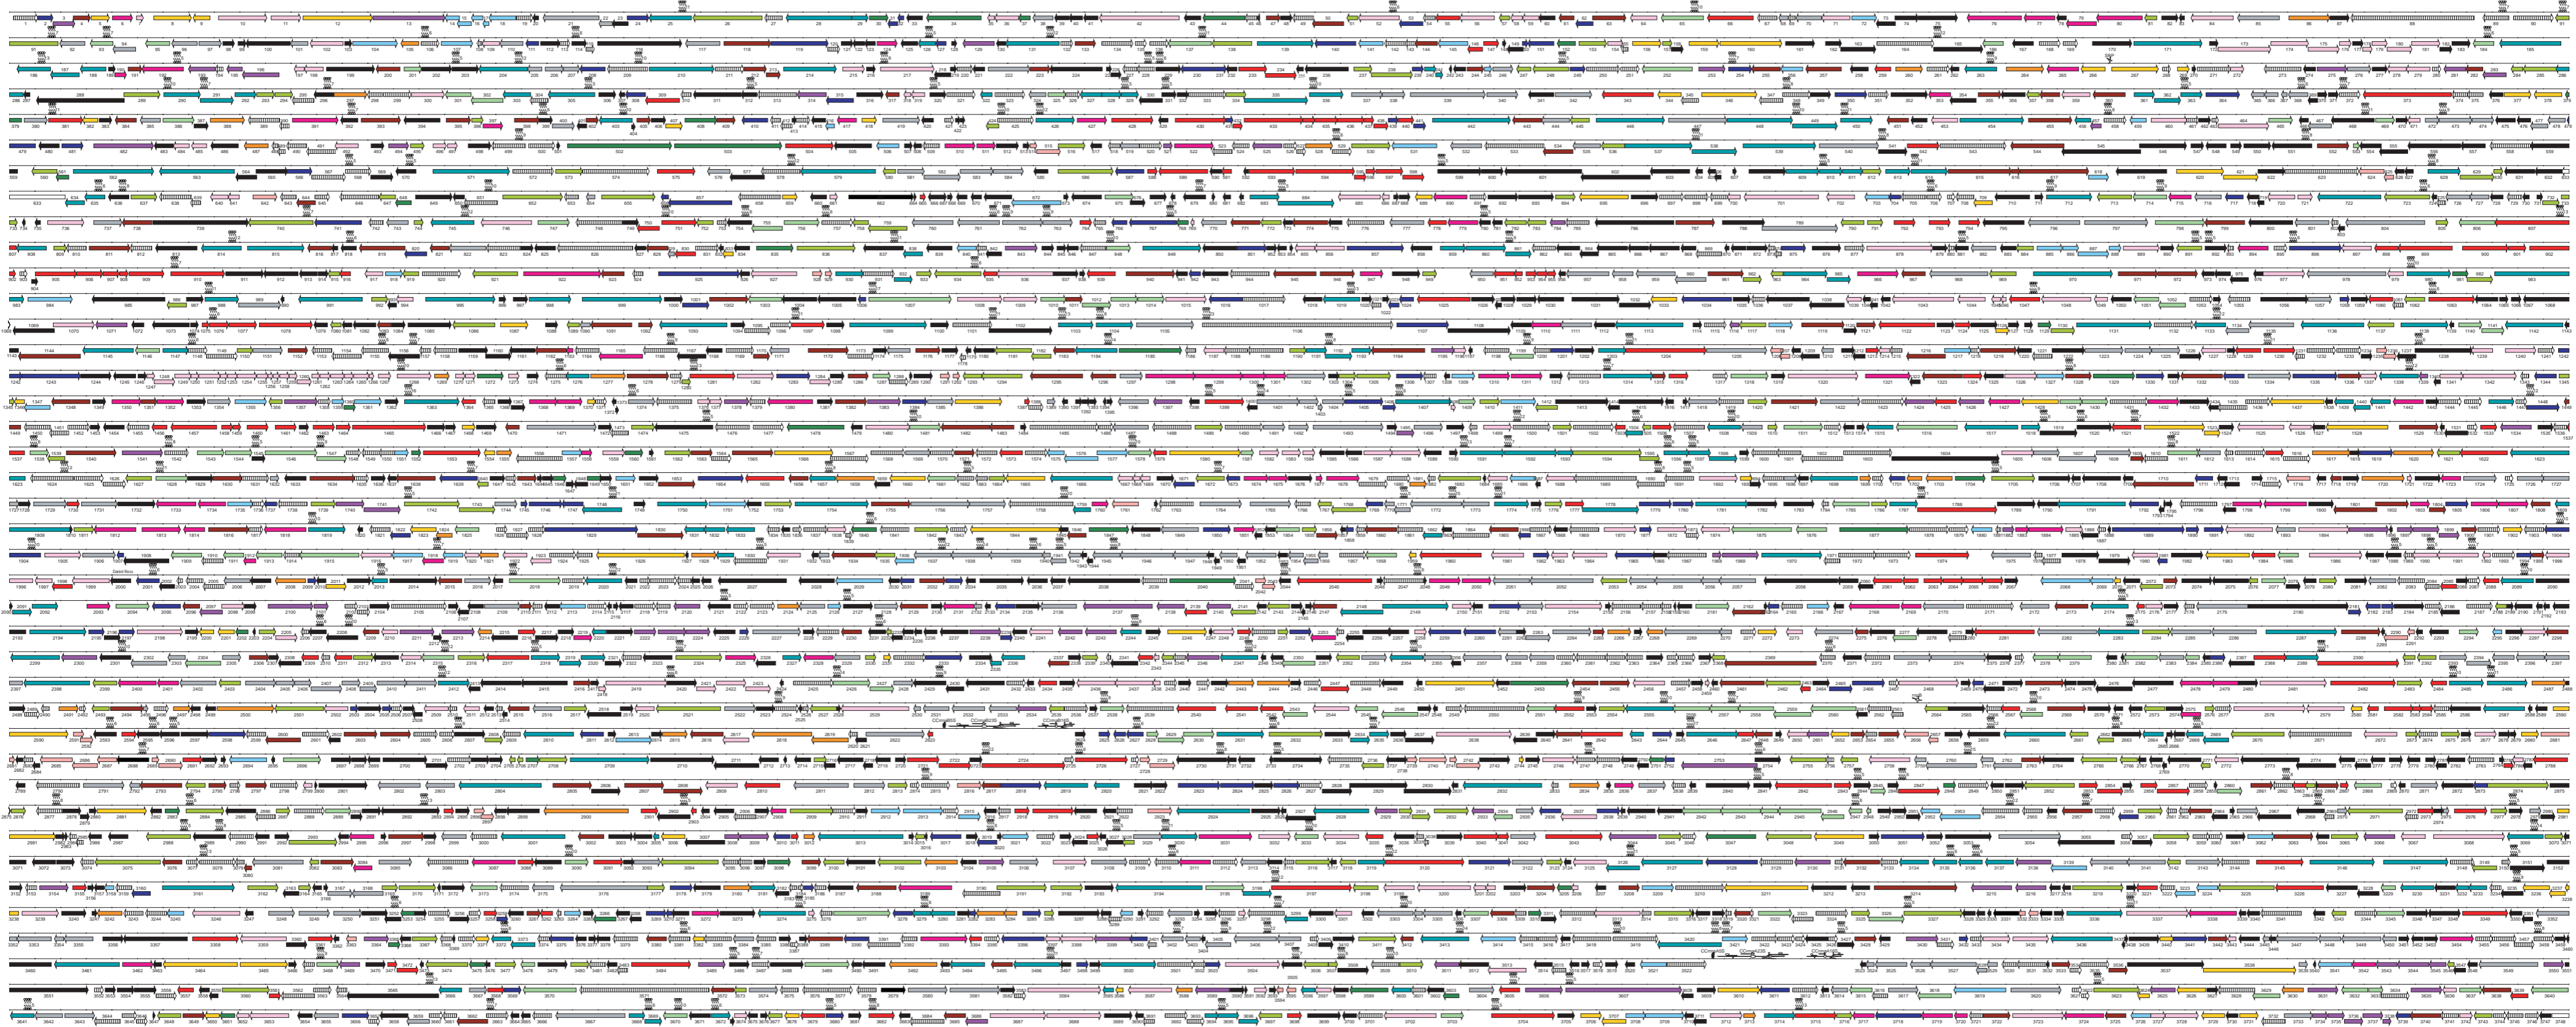

|                                                                                                                                                                                                                                |                                                                                                                 |                                                                                                                                                                                                                                                                     |                                                                                                                                                                                                                                                                             |                                                                                                                                                                                |
|--------------------------------------------------------------------------------------------------------------------------------------------------------------------------------------------------------------------------------|-----------------------------------------------------------------------------------------------------------------|---------------------------------------------------------------------------------------------------------------------------------------------------------------------------------------------------------------------------------------------------------------------|-----------------------------------------------------------------------------------------------------------------------------------------------------------------------------------------------------------------------------------------------------------------------------|--------------------------------------------------------------------------------------------------------------------------------------------------------------------------------|
| <ul style="list-style-type: none"> <li> Signal peptide</li> <li> LP Lipoprotein</li> <li> Transporter</li> <li> GES region</li> <li> Paralogous gene family</li> <li> Authentic Frame Shift</li> <li> Repeat Region</li> </ul> | <ul style="list-style-type: none"> <li> 23s rRNA</li> <li> 16s rRNA</li> <li> 5s rRNA</li> <li> tRNA</li> </ul> | <ul style="list-style-type: none"> <li> Amino acid biosynthesis</li> <li> Biosynthesis of cofactors, prosthetic groups, carriers</li> <li> Cell envelope</li> <li> Cellular processes</li> <li> Central intermediary metabolism</li> <li> DNA Metabolism</li> </ul> | <ul style="list-style-type: none"> <li> Energy metabolism</li> <li> Fatty acid/Phospholipid metabolism</li> <li> Purines, pyrimidines, nucleosides and nucleotides</li> <li> Regulatory functions</li> <li> Transcription-binding proteins</li> <li> Translation</li> </ul> | <ul style="list-style-type: none"> <li> Transcription</li> <li> Other categories</li> <li> Unknown function</li> <li> Conserved hypothetical</li> <li> Hypothetical</li> </ul> |
|--------------------------------------------------------------------------------------------------------------------------------------------------------------------------------------------------------------------------------|-----------------------------------------------------------------------------------------------------------------|---------------------------------------------------------------------------------------------------------------------------------------------------------------------------------------------------------------------------------------------------------------------|-----------------------------------------------------------------------------------------------------------------------------------------------------------------------------------------------------------------------------------------------------------------------------|--------------------------------------------------------------------------------------------------------------------------------------------------------------------------------|

1 kb
